# Supplementary material for: Study protocol for the COPE study: COVID-19 in Older PEople: the influence of frailty and multimorbidity on survival. A multicentre, European observational study
Source: PubMed Central journal article supplement — BMJ Open. 2020 Sep 29;10(9):e040569. doi: 10.1136/bmjopen-2020-040569 (PMC7526029; doi:10.1136/bmjopen-2020-040569), 2020-09-29
Supplement: bmjopen-2020-040569.draft_revisions.pdf [file bmjopen-2020-040569.draft_revisions.pdf]

# BMJ Open

BMJ Open is committed to open peer review. As part of this commitment we make the peer review history of every article we publish publicly available.

When an article is published we post the peer reviewers' comments and the authors' responses online. We also post the versions of the paper that were used during peer review. These are the versions that the peer review comments apply to.

The versions of the paper that follow are the versions that were submitted during the peer review process. They are not the versions of record or the final published versions. They should not be cited or distributed as the published version of this manuscript.

BMJ Open is an open access journal and the full, final, typeset and author-corrected version of record of the manuscript is available on our site with no access controls, subscription charges or pay-per-view fees (<http://bmjopen.bmj.com>).

If you have any questions on BMJ Open's open peer review process please email [info.bmjopen@bmj.com](mailto:info.bmjopen@bmj.com)

# BMJ Open

## COPE study: COVID-19 in Older PEople – the influence of frailty and multimorbidity on survival. A multi-centre, international observational study

|                               |                                                                                                                                                                                                                                                                                                                                                                                                                                                                                                                                                                                                                                                                                                                                                                                                                                                                                                                     |
|-------------------------------|---------------------------------------------------------------------------------------------------------------------------------------------------------------------------------------------------------------------------------------------------------------------------------------------------------------------------------------------------------------------------------------------------------------------------------------------------------------------------------------------------------------------------------------------------------------------------------------------------------------------------------------------------------------------------------------------------------------------------------------------------------------------------------------------------------------------------------------------------------------------------------------------------------------------|
| Journal:                      | <i>BMJ Open</i>                                                                                                                                                                                                                                                                                                                                                                                                                                                                                                                                                                                                                                                                                                                                                                                                                                                                                                     |
| Manuscript ID                 | bmjopen-2020-040569                                                                                                                                                                                                                                                                                                                                                                                                                                                                                                                                                                                                                                                                                                                                                                                                                                                                                                 |
| Article Type:                 | Protocol                                                                                                                                                                                                                                                                                                                                                                                                                                                                                                                                                                                                                                                                                                                                                                                                                                                                                                            |
| Date Submitted by the Author: | 18-May-2020                                                                                                                                                                                                                                                                                                                                                                                                                                                                                                                                                                                                                                                                                                                                                                                                                                                                                                         |
| Complete List of Authors:     | Price, Angeline; Salford Royal NHS Trust, Ageing and Complex Medicine<br>Barlow-Pay, Fenella; Royal Alexandra Hospital<br>Duffy, Siobhan; Royal Alexandra Hospital<br>Pearce, Lyndsay; Salford Royal NHS Foundation Trust<br>Vilches-Moraga, Arturo; Salford Royal NHS Foundation Trust,<br>Moug, Susan; Royal Alexandra Hospital, General Surgery; University of Glasgow<br>Quinn, Terry; University of Glasgow, Cardiovascular and Medical Sciences<br>Stechman, Michael; University Hospital of Wales, General Surgery<br>Braude, Philip; North Bristol NHS Trust<br>Mitchell, Emma; North Bristol NHS Trust<br>Myint, Phyo; University of Aberdeen,<br>Verduri, Alessia; Hospital Policlinico Modena<br>McCarthy, Kathryn; North Bristol NHS Trust<br>Carter, Ben; King's College London, Biostatistics & Health Informatics; King's College London<br>Hewitt, Jonathan; Cardiff University, Geriatric Medicine |
| Keywords:                     | GERIATRIC MEDICINE, Clinical audit < HEALTH SERVICES ADMINISTRATION & MANAGEMENT, Health policy < HEALTH SERVICES ADMINISTRATION & MANAGEMENT, Public health < INFECTIOUS DISEASES                                                                                                                                                                                                                                                                                                                                                                                                                                                                                                                                                                                                                                                                                                                                  |
|                               |                                                                                                                                                                                                                                                                                                                                                                                                                                                                                                                                                                                                                                                                                                                                                                                                                                                                                                                     |

SCHOLARONE™  
Manuscripts

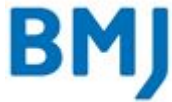

I, the Submitting Author has the right to grant and does grant on behalf of all authors of the Work (as defined in the below author licence), an exclusive licence and/or a non-exclusive licence for contributions from authors who are: i) UK Crown employees; ii) where BMJ has agreed a CC-BY licence shall apply, and/or iii) in accordance with the terms applicable for US Federal Government officers or employees acting as part of their official duties; on a worldwide, perpetual, irrevocable, royalty-free basis to BMJ Publishing Group Ltd ("BMJ") its licensees and where the relevant Journal is co-owned by BMJ to the co-owners of the Journal, to publish the Work in this journal and any other BMJ products and to exploit all rights, as set out in our [licence](#).

The Submitting Author accepts and understands that any supply made under these terms is made by BMJ to the Submitting Author unless you are acting as an employee on behalf of your employer or a postgraduate student of an affiliated institution which is paying any applicable article publishing charge ("APC") for Open Access articles. Where the Submitting Author wishes to make the Work available on an Open Access basis (and intends to pay the relevant APC), the terms of reuse of such Open Access shall be governed by a Creative Commons licence – details of these licences and which [Creative Commons](#) licence will apply to this Work are set out in our licence referred to above.

Other than as permitted in any relevant BMJ Author's Self Archiving Policies, I confirm this Work has not been accepted for publication elsewhere, is not being considered for publication elsewhere and does not duplicate material already published. I confirm all authors consent to publication of this Work and authorise the granting of this licence.

1  
2  
3 **COVER LETTER.**  
4  
5  
6  
7  
8

9 Department of Ageing and Complex Medicine

10 Salford Royal Hospital

11  
12  
13 16<sup>th</sup> May 2020  
14  
15

16 Dear Managing Editor  
17

18  
19  
20 We attach a copy of our protocol paper for consideration for publication with BMJ Open.  
21

22 **COPE study: COVID-19 in Older PEople – the influence of frailty and multimorbidity on**  
23 **survival. A multi-centre, international observational study.**  
24

25 We are established international collaborative group with a focus on older adult outcomes.  
26 This protocol has already produced one submitted paper with 4 others in the final stages of  
27 drafting. These papers all focus on older adult outcomes in the setting of the COVID-19  
28 pandemic making this paper extremely topical and relevant to your readership. In addition,  
29 we hope that this will mean a number of citations for this work.  
30  
31

32  
33 We have a strong publication record as a group and have achieved high Altmetric scores  
34 from our recent publications that we hope will happen with this protocol paper (Hewitt et al,  
35 Age and Ageing, 2019; Carter et al, BJS 2020; Parmar et al, Annals of Surgery, 2019).  
36  
37

38  
39 We confirm that neither the manuscript nor any parts of its content are currently under  
40 consideration or published in another journal, nor have we any prior submissions of this work  
41 to any other journals.  
42  
43

44  
45  
46 We thank you in advance for your consideration of our work.  
47  
48

49 Yours  
50

51  
52  
53 **Miss Angeline Price**

54  
55 **Advanced Clinical Practitioner, Salford Royal Hospital**  
56  
57  
58  
59  
60

**COPE study: COVID-19 in Older PEople – the influence of frailty and multimorbidity on survival. A multi-centre, international observational study.**

**Price A<sup>1</sup>, Barlow-Pay F<sup>2</sup>, Duffy S<sup>3</sup>, Pearce L<sup>4</sup>, Vilches-Moraga A<sup>5</sup>, Moug SJ<sup>6</sup>, Quinn T<sup>7</sup>, Stechman M<sup>8</sup>, Braude P<sup>9</sup>, Mitchell E<sup>10</sup>, Myint PK<sup>11</sup>, Verduri A<sup>12</sup>, McCarthy K<sup>13</sup>, Carter B<sup>14</sup>, & Hewitt J<sup>15</sup>, on behalf of the COPE Study Collaborators\***

1. Miss Angeline Price (Corresponding Author), Advanced Clinical Practitioner, Department of Ageing and Complex Medicine, Salford Royal Hospital, Stott Lane, Salford M6 8HD  
[angeline.price@srft.nhs.uk](mailto:angeline.price@srft.nhs.uk)
2. Dr Fenella Barlow-Pay, Anaesthetic Trainee, Royal Alexandra Hospital, Corsebar Road, Paisley, Scotland, PA2 9PN
3. Dr Siobhan Duffy, Surgical Trainee, Royal Alexandra Hospital, Corsebar Road, Paisley, Scotland, PA2 9PN.
4. Miss Lyndsay Pearce, Consultant Surgeon, Salford Royal Hospital, Stott Lane, Salford M6 8HD
5. Dr Arturo Vilches- Moraga Consultant Geriatrician, Department of Ageing and Complex Medicine, Salford Royal Hospital, Stott Lane, Salford M6 8HD; [arturo.vilches-moraga@srft.nhs.uk](mailto:arturo.vilches-moraga@srft.nhs.uk)
6. Professor Susan Moug, Consultant Surgeon, Royal Alexandra Hospital, Corsebar Road, Paisley, Scotland, PA2 9PN and Honorary Professor, University of Glasgow, University Avenue, Glasgow, Scotland, G12 8QQ. [susanmoug@nhs.net](mailto:susanmoug@nhs.net)
7. Dr Terence J Quinn FRCP MD MBChB, Clinical Senior Lecturer, University of Glasgow and Honorary Consultant Physician, Glasgow Royal Infirmary email [terry.quinn@glasgow.ac.uk](mailto:terry.quinn@glasgow.ac.uk)
8. Mr Michael J Stechman, MBChB FRCS MD, Consultant Surgeon, University Hospital of Wales, Heath Park, Cardiff, CF14 4XW
9. Dr Philip Braude, Consultant Geriatrician, North Bristol NHS Trust
10. Dr Emma Mitchell BM MRCP, Specialist Registrar Geriatric Medicine, North Bristol NHS Trust
11. Professor Phyo Kyaw Myint, Professor of Medicine of Old Age, University of Aberdeen, Aberdeen, Scotland
12. Dr Alessia Verduri, Consultant Respiratory Physician, Respiratory Unit - University of Modena and Reggio Emilia - Hospital Policlinico Modena (Italy); [VerduriA@cardiff.ac.uk](mailto:VerduriA@cardiff.ac.uk)
13. Miss Kathryn McCarthy, Consultant Surgeon, North Bristol NHS Trust
14. Dr Ben Carter PhD, Senior trial statistician, Kings College London

1  
2  
3 15. Dr Jonathan Hewitt, Clinical Senior Lecturer, Cardiff University and Honorary Consultant  
4 Physician, Aneurin Bevan University Health Board  
5  
6  
7  
8  
9  
10  
11  
12  
13  
14  
15  
16  
17  
18  
19  
20  
21  
22  
23  
24  
25  
26  
27  
28  
29  
30  
31  
32  
33  
34  
35  
36  
37  
38  
39  
40  
41  
42  
43  
44  
45  
46  
47  
48  
49  
50  
51  
52  
53  
54  
55  
56  
57  
58  
59  
60

For peer review only

## ABSTRACT

### Introduction

This protocol describes an observational study which set out to assess whether frailty and/or multi-morbidity correlates with short and medium term outcomes in patients diagnosed with COVID-19 in an international, multi-centre setting. OPSOC is a well-established surgical and geriatric research with an interest in outcomes specific to the care of older persons. Using existing networks, OPSOC aim to build upon available literature supporting decision making for vulnerable patient cohorts during the Covid-19 pandemic.

### Methods and analysis

Over a 3-month period we aim to recruit a minimum of 500 patients across ten hospital sites, collecting baseline data including: patient demographics; presence of co-morbidities; relevant blood tests on admission; prescription of ACEi/ ARBs/ NSAIDs/ immunosuppressants; smoking status; Clinical Frailty Score (CFS); length of hospital stay; critical care admission; need for mechanical ventilation; 7- and 90-day mortality and 30-day readmission. All patients receiving inpatient hospital care > 18 years who receive a diagnosis of COVID-19 are eligible for inclusion.

Our primary analysis will be a logistic regression of 7- and 90-day mortality by Clinical Frailty Score, adjusted for age (18-64, 65-80 and > 80) and gender. We will carry out a secondary analysis of the primary outcome by including additional clinical mediators which are determined statistically important using a likelihood ratio test. All analyses will be presented as adjusted OR with associated 95% CIs and p values.

### Ethics and Dissemination

This study has been registered, reviewed and approved by the appropriate organisations to each site's geographical location. All participating units obtained approval from their local Research & Development department consistent with the guidance from their relevant national organisation.

Data will be reported as a whole cohort. This project will be submitted for presentation at a national or international surgical and geriatric conference. Manuscript(s) will be prepared following the close of the project.

## ARTICLE SUMMARY:

### STRENGTHS AND LIMITATIONS:

- The results of this observational study will provide valuable information to inform decision making specific to the UK population
- This is a large multi-site study allowing for representation of varying levels of age, ethnicity and social deprivation within data analysis
- Data collection is not entirely prospective. Some will be collected retrospectively
- The track record of the OPSOC group means results and dissemination of this study are deliverable
- The Clinical Frailty Scale is not widely validated in the under 65's, but with recent guidance supporting its use in resource allocation during Covid-19 this will provide useful information on how this guidance has been implemented in practice

### 1. INTRODUCTION.

Severe acute respiratory syndrome coronavirus 2 (SARS-CoV-2 or COVID-19) was identified in 2019 as a novel strain of pneumonia inducing virus. Coronaviruses have been identified since the 1960s, with other strains including SARS in 2003 and MERS in 2012 causing significant human harm and global spread. COVID-19 has now been declared as a current worldwide pandemic [1] with predominant symptoms including: fever, cough and shortness of breath. The majority of people with COVID-19 have mild symptoms (81%), some develop severe illness requiring oxygen therapy (14%), with a smaller number requiring mechanical ventilation and/or intubation (5%) [2]. The most common presentation in severe COVID-19 is bilateral pneumonia [2].

Certain risk factors have been identified as predisposing patients to poor outcomes such as hospital admission, need for ventilation and subsequent death. Individuals with risk factors including older age and comorbidities such as hypertension, cardiovascular disease and diabetes mellitus, have an increased risk of severe disease and mortality [3]. There has been speculation that drugs such as angiotensin converting enzyme inhibitors (ACEi) (eg ramipril, lisinopril, perindopril) and angiotensin receptor blockers (ARB) (losartan, candesartan), commonly taken by patients with hypertension, heart failure and diabetes mellitus, might increase susceptibility to coronavirus infection [4], as might other groups of drugs including non-steroidal anti-inflammatory drugs (NSAIDs) and immunosuppressants. These could be simple association rather than causation given the common use of pharmacotherapy such as ACEi and ARBs in multimorbid individuals. Chronic musculoskeletal and respiratory diseases are common in our ageing population and as a result there is a high usage of NSAIDs (either prescribed or over-the-counter) and long-term steroids. There is a theoretical possibility that immunosuppressants, such as steroids or other agents, used treat other conditions (e.g. renal disease, vasculitis, inflammatory bowel disease, transplant) confer benefit by modifying the host immune response to the virus resulting in less severe illness. [5].



1  
2  
3 Current professional guidelines recommend continuing these drugs [6,7]. This is based on a  
4 lack of available evidence that would clearly support withholding these medications during  
5 the COVID-19 pandemic. By collecting data on these medications and their relationship to  
6 COVID-19 outcomes, we aim to improve on the current deficiency in evidence on whether it  
7 is safe to continue these medications, or whether they should be withdrawn.  
8  
9

10  
11  
12 Frailty is recognised as a potential contributing factor to poor outcomes in COVID-19. Frailty  
13 is characterised by reduced physiological reserve [8] and defined as 'a medical syndrome  
14 with multiple causes and contributors that is characterised by diminished strength,  
15 endurance and reduced physiological function that increases an individual's vulnerability for  
16 developing increased dependency or death' [9]. The frailty phenotype model categorises  
17 individuals into frail, pre-frail or not frail according to the presence of weight loss, self-  
18 reported exhaustion, low energy expenditure, slow gait speed and weak grip strength [10].  
19 The cumulative deficit model is validated to grade frailty in a person by identifying disability  
20 and comorbidity [11]. Frailty is associated with greater age, but not exclusively [12], and has  
21 been shown to correlate with adverse clinical outcomes including length of stay, mortality  
22 and institutionalisation. This association with frailty is present not only in geriatric medicine,  
23 but across a range of ages, specialties and interventions [13-16]. As a result, hospital teams  
24 are encouraged to routinely score frailty in adults [17, 18]. Frailty is more widely used than  
25 age alone as a trigger for specialist resource allocation, pathway decision aid and in shared  
26 decision making in older patients [19, 20]. Recent guidance from the National Institute for  
27 Clinical Excellence (NICE) recommended identification of frailty as part of a holistic  
28 assessment in facilitation of discussions with patients regarding critical care interventions in  
29 COVID-19 [21].  
30  
31  
32  
33  
34  
35

36 Despite this, and due to the novel nature of COVID-19, no information is available on how  
37 frailty affects overall outcomes. Whilst evidence relating to factors which pose an increased  
38 risk of poor outcomes for patients with COVID-19 has begun to emerge globally [22-24],  
39 there remains a paucity of evidence relating specifically to the UK population. This study  
40 aims to provide evidence regarding some of the patient characteristics which might indicate  
41 poor outcomes, as applies to the UK population and healthcare systems. It will provide  
42 valuable information about differences in care worldwide for the benefit of patients. Emerging  
43 narrative is demonstrating tentative links between both social deprivation and ethnicity on  
44 adverse outcomes in COVID-19 [25] therefore this information has been incorporated into  
45 baseline data collection in order to determine how outcomes across groups differed  
46 according to these characteristics.  
47  
48  
49  
50  
51

52 Our team ([www.opsoc.eu](http://www.opsoc.eu)) have widely collected data on frailty previously using routinely  
53 collected service evaluation level data.  
54  
55  
56

57 Currently ten OPSOC partner hospitals, including one site in Italy have joined the study. The  
58 study remains open to new recruiting sites. Following ethical approval, we will advertise  
59 recruitment through the established clinical research networks in Geriatric Medicine  
60

1  
2  
3 (GemRes, based in Birmingham and WeGen based in Wales) and via social media, notably  
4 Twitter, a platform upon which a high level of interest in COVID-19 related healthcare  
5 developments has been evidenced. Other sites will be eligible to recruit subject to local  
6 approval.  
7  
8  
9

## 10 **Aims**

11  
12 To assess whether frailty and/or multimorbidity correlates with poor clinical outcomes in adult  
13 patients diagnosed with COVID-19 virus in a multi-centre setting.  
14

15 The following research questions will be addressed:  
16

- 17 1. What are the outcomes for frail and/ or multi-morbid adults diagnosed with COVID-19,  
18 including length of hospital stay and mortality?  
19
- 20 2. What other factors influence outcomes in this setting, including medication, source of  
21 COVID-19 (community or nosocomial), socio-economic deprivation; ethnicity.  
22  
23  
24  
25  
26  
27  
28  
29  
30  
31  
32  
33  
34  
35  
36  
37  
38  
39  
40  
41  
42  
43  
44  
45  
46  
47  
48  
49  
50  
51  
52  
53  
54  
55  
56  
57  
58  
59  
60

## 2. METHODS.

### 2.1 Study Summary

Table 1 provides the summary of the COPE study information.

**Table 1:** Study Summary

|                          |                                                                                                                                                                                                                                                                                                                                                                                                                                                                                                                                                               |
|--------------------------|---------------------------------------------------------------------------------------------------------------------------------------------------------------------------------------------------------------------------------------------------------------------------------------------------------------------------------------------------------------------------------------------------------------------------------------------------------------------------------------------------------------------------------------------------------------|
| Study Title              | COVID-19 in Older PEople – the influence of frailty and multimorbidity on survival.                                                                                                                                                                                                                                                                                                                                                                                                                                                                           |
| Short Title              | COPE study                                                                                                                                                                                                                                                                                                                                                                                                                                                                                                                                                    |
| Study Design             | Observational                                                                                                                                                                                                                                                                                                                                                                                                                                                                                                                                                 |
| Study Participants       | Adults aged 18 years and older, inpatients in an acute hospital setting with an illness relating to COVID -19                                                                                                                                                                                                                                                                                                                                                                                                                                                 |
| Planned Size of Sample   | minimum 500                                                                                                                                                                                                                                                                                                                                                                                                                                                                                                                                                   |
| No of study sites        | Minimum 10                                                                                                                                                                                                                                                                                                                                                                                                                                                                                                                                                    |
| Start date               | 27 <sup>th</sup> February 2020.                                                                                                                                                                                                                                                                                                                                                                                                                                                                                                                               |
| Planned Study Period     | 3 months                                                                                                                                                                                                                                                                                                                                                                                                                                                                                                                                                      |
| Follow up duration       | 6 months                                                                                                                                                                                                                                                                                                                                                                                                                                                                                                                                                      |
| Ethics/ registration No. | Health Research Authority (20/HRA1898)<br>Ethics Committee of Hospital Policlinico Modena (369/2020/OSS/AOUMO) Italy<br>Health & Care Research Permissions Service, Wales<br>NHS Research Scotland Permissions Co-ordinating Centre, Scotland                                                                                                                                                                                                                                                                                                                 |
| Research Question/Aim(s) | To assess frailty and multi-morbidity in older adults receiving acute inpatient care with a confirmed diagnosis of COVID -19. To correlate frailty with both short term and long-term outcomes.<br><br>A secondary research question is the effect of ACEi, ARB, non-steroidal anti-inflammatory and immunosuppressive medications in COVID–19 patients.<br><br>A further research question is how other factors including source of COVID-19 (community vs nosocomial), socio-economic deprivation; ethnicity and gender influence outcomes in this setting. |

## 2.2 Study design and setting.

Study setting: NHS hospitals in the UK and Worldwide partners (who will require separate local ethical compliance) that provide emergency care for patients diagnosed with COVID-19 have been invited to participate. OPSOC is an established research collaborative, predominantly but not exclusively focussing on surgery in the older person. OPSOC has a proven record of conducting high quality research and successfully publishing results relating to outcomes for older people [26-29]. OPSOC has an international reputation, related specifically to the care of the frail older person. Using well established research networks and experience in collaborative research and frailty, we wish to explore outcomes for older patients with COVID-19 infection.

Ten hospitals are already members of the OPSOC collaborative and are actively treating COVID-19 patients – Newport, Cardiff, Southmead Hospital Bristol, Bristol Royal Infirmary, Aberdeen Royal Infirmary, Royal Alexandra Hospital Paisley, Inverclyde Royal Infirmary, Salford Royal Hospital, Addenbrookes Hospital Cambridge, and Modena, Italy. The study will be open to other sites.

Research will be conducted using the established surgical and geriatric registrar-led research networks [30,31]. The methodology for these networks is well described but in brief the networks provide local Principal Investigators (PI's) that will co-ordinate local data collection and approvals in conjunction with Good Clinical Practice. These local leads act as a link between the local COPE team and the central Study Management Group (SMG). The Study Management Group will provide the ethical approvals, protocol and central organisation. Ultimately the SMG will analyse data and disseminate study findings, recognising all collaborators.

## 2.3 Study population.

**Inclusion criteria:** Any patient receiving inpatient hospital care with a clinical and/or laboratory confirmed diagnosis of COVID-19 aged 18 years and above

**Exclusion criteria:** Patients less than 18 years of age, and all patients aged 18 years and above without a clinically and/or laboratory confirmed diagnosis of COVID-19.

**Patient Screening:** Patients will be screened for inclusion criteria by the local team. This will be undertaken by a range of health care professionals involved in direct patient care at each site. Hospital or National Health Service (NHS) number will not be entered into this form but will be kept separately with a key sheet.

All transmission and storage of data will be encrypted and compliant with Health Insurance Portability and Accountability Act security guidelines. No patient identifiable information will be uploaded or stored on the secure database (password-protected login). Collaborators will anonymise patients by recording patient hospital numbers alongside database numbers in a separate secure spreadsheet to facilitate the collection of data locally. This database will be held within Cardiff University, Wales and stored for a minimum of 5 years.

## 2.4 Variables collected.

### Baseline data

- ▶ age, gender, deprivation score, ethnic origin
- ▶ co-morbidities: coronary artery disease, diabetes mellitus, hypertension, and the prescription of ACEi or ARB, NSAIDs and immunosuppressive agents
- ▶ smoking status (Never, Ex and Current)
- ▶ blood tests on admission or at time of symptom development: albumin, CRP, eGFR
- ▶ Clinical frailty score (CFS): 1-9 [supplementary Appendix B]

### Primary outcomes

- ▶ Short-term mortality in frail vs non-frail patients with a COVID-19 diagnosis
- ▶ Long-term mortality in frail vs non-frail patients with a COVID-19 diagnosis.

### Secondary outcomes

- ▶ Length of hospital stay (measured in days from time of admission and/ or time of COVID-19 diagnosis);
- ▶ Length of stay on intensive care unit (measured in days) and requirement for invasive ventilation (yes/no, number of days)
- ▶ 30-day readmission to local hospital
- ▶ Effect of certain drug classes on outcomes in patients with COVID-19
- ▶ Effect of deprivation score and ethnicity on outcomes in patients with COVID-19
- ▶ Effect of gender on outcomes in patients with COVID-19
- ▶ Requirement for non-invasive ventilation at any level of care (yes/no, number of days)

### Frailty assessment

We will use the Rockwood Clinical Frailty Score (Appendix A). This has been validated for use to assess frailty in older patients [11]. The score ranks from 1 to 9 with a score of  $\geq 5$  being classed as frail and 9 as terminally ill, and is based upon function 2 weeks prior to hospital admission. To ensure data quality each PI ensured adequate knowledge within the data collection team of frailty scoring using a short training video on how to complete the Clinical Frailty Scale 1-9.

## 2.5 Data management, Data protection and patient confidentiality

All investigators and trial site staff will comply with the requirements of General Data Protection Regulation with regards to the collection, storage, processing and disclosure of personal information and will uphold the Data Protection Act's core principles.

Where personal information is collected, it will be kept secure, and maintained. This will involve:

- the creation of coded, depersonalised data where the participant's identifying information is replaced by an unrelated sequence of characters
- secure maintenance of the data and the linking code in separate locations using encrypted digital files within password protected folders and storage media
- limiting access to the minimum number of individuals necessary for quality control, audit, and analysis
- Confidentiality of data will be preserved when the data are transmitted to sponsors and co-investigators as patients will be assigned a study ID number.
- Data collected from sites will be via the electronic database.
- Data custodian is Dr Jonathan Hewitt.
- Only researchers who are directly involved in the data analysis will have full access to the study dataset (KM, BC, PB, SM, JH, PKM).

## 2.6 Statistical Analysis and Sample Size.

We will aim to recruit 500 patients; 50 patients across at least 10 sites. We estimated a minimum of 30% mortality in those that were frail, and 20% in those not frail (Hazard Ratio of 0.60). In order to detect this difference with 80% power and with a 5% significance at least 500 patients are needed to detect this difference. However, due to the emergent nature of this condition, it is envisaged that an interim analysis will be conducted as sample size increases.

Statistical support will be provided by OPSOC. Data will be analysed for correlation between frailty and outcomes, including Day 7 and Day 90 mortality. Our primary analyses will measure mortality as the time-to-mortality using a mixed-effects Cox proportional hazards model, fitting site as a shared frailty (random intercept) to account for heterogeneity across different hospital sites. Secondary analyses will include: mortality at the short term (Day 7), analysed with a mixed effects logistic regression at Day 7 mortality; and time-to-discharge (herein described as length of stay), analyses as a time-to-event analysis consistent with the primary analysis.

Secondary analyses will be adjusted for age group and gender, and other clinically important covariates. Other clinically important covariates will be included after discussion with the COPE investigators, once more information is known about the link between baseline covariates and their association with COVID-19 (e.g. comorbidities). We will carry out a secondary analysis of the primary outcome by including additional clinical mediators which are determined clinically important and presented as a final multivariable model. All analyses will be presented as adjusted OR with associated 95% CIs and p values. All other outcomes will be analysed as per the above analysis, but will be deemed secondary outcomes.

1  
2  
3 Longer term time-points (e.g. Day 90) to be determined by the COPE investigators on  
4 receipt of further information from COVID-19 investigation.  
5

6 The time to mortality (or discharge) will be recorded from the date of admission, to the date  
7 of outcome and will be considered community acquired. Where a patient has a positive  
8 COVID-19 diagnosis that is reported fifteen days after admission (or later), they will be  
9 recorded as the date from diagnosis to outcome and considered as nosocomial infection.  
10

11 Missing data will be explored for symptomatic rationale and may be imputed after discussion  
12 with the COPE investigators. Subgroups for Age, sex, comorbidities may be explored to  
13 explain any mechanism of action found.  
14  
15

16 Anticipated recruitment data will be collected at participating sites for all patients meeting the  
17 inclusion criteria over a 3-month period. Validation will be performed by local teams on 25%  
18 of data fields for 10% of cases. The validated fields will include key demographic and  
19 outcome data.  
20  
21  
22

## 23 **2.7 Study Management Group (SMG).**

24 This will be led by PKM (Aberdeen) and will involve reviewing safety data and liaising with  
25 the Data Monitoring Committee regarding safety issues. These are observational data and  
26 there are minimal safety issues expected.  
27  
28

## 29 **2.8 Patient and Public Involvement**

30 Due to the rapid onset of this pandemic and the urgency in analysis and dissemination of  
31 findings that will influence management of COVID-19 patients, it will not be possible to  
32 develop a PPI group of patients who have survived this illness. Many of them will remain  
33 clinically unwell, or in a period of self-isolation following COVID-19 infection. Towards the  
34 end of the study, if medically appropriate, the sponsor site will invite a group of patients back  
35 to the hospital to discuss their experiences. This will enable identification of key areas into  
36 which further investigation is required.  
37  
38  
39  
40  
41

## 42 **2.9 Role Of Study Sponsor And Funder.**

43 Aneurin Bevan NHS Trust, as the honorary NHS employer of the CI, has a critical role as  
44 part of the governance board of this project. Cardiff University (the CI's substantive  
45 employer) is the Sponsor of the study. The sponsor is accountable for ensuring that the work  
46 is governed effectively and delivers the objectives that meet identified needs.  
47  
48

49 The sponsor will control the final decision regarding the study design, conduct, manuscript  
50 writing and dissemination of results.  
51  
52

53 The study at the time of writing has not received funding.  
54  
55

## 56 **3.0 Quality assurance and Indemnity.**

57 The quality of this study has been assessed by the following means:  
58  
59  
60



- ▶ Establishment of the Study Management Group.
- ▶ Peer review by professionals with relevant expertise (Clinical trialists, nurses, frontline medical staff, statisticians, surgeons and geriatricians).
- ▶ Review by team at Cardiff University (Sponsor Institution).
- ▶ Safety reporting/adverse events will be reported by PIs. However, as this study involved routinely collected hospital data, we do not predict any.

This is an NHS-sponsored research stud, therefore indemnity cover via HSG (96) 48 applies.

### 3.1 Ethical approval

Ethical approval for the study was sought via proportional ethical review. However, data collected are routinely recorded clinical data. Therefore, the study was deemed not to require ethical approval and approval for the study was granted by the Health Research Authority (HRA) in the UK (<https://www.hra.nhs.uk/>) .

Subsequently, this study has been registered, reviewed and approved by the following organisations:

- ▶ The HRA (Health Research Authority) for sites in England (20/HRA1898).
- ▶ The NRSPCC (NHS Research Scotland Permissions Co-ordinating Centre) for sites in Scotland, with reciprocal approval was granted in Scotland by NRSPCC on 20th April 2020.
- ▶ The Health & Care Research Permissions Service for sites in Wales
- ▶ Ethics Committee of Hospital Policlinico Modena (369/2020/OSS/AOUMO) Italy

All participating units must obtain approval from their local Research & Development department consistent with the guidance from their relevant national organisation:

The project will therefore be registered locally with the NHS Trust or Health Board or Institutional Research & Development department prior to commencing patient identification and data collection at each site. It is the responsibility of the local COPE Study team to ensure that local Research and Development approvals are in place prior to commencing data collection.

### 3.2 Dissemination

All data will be reported as a whole cohort. Unit level data for comparison will be fed back to collaborators to support local service improvement. This project will be submitted for presentation at a national or international surgical and geriatric conference. Manuscript(s) will be prepared following the close of the project. Manuscripts will also be prepared following interim data analysis if numbers of patients recruited to the study at that time exceed the stated sample size.



## References

1. WHO Director-General's opening remarks at the media briefing on COVID-19. World Health Organization (WHO) (Press release). 11 March 2020. Available online: <https://www.who.int/dg/speeches/detail/who-director-general-s-opening-remarks-at-the-media-briefing-on-covid-19---11-march-2020> (accessed 09 May 2020).
2. World Health Organization. Clinical management of severe acute respiratory infection (SARI) when COVID-19 disease is suspected. Interim guidance. 13 March 2020. Available online: [https://www.who.int/publications-detail/clinical-management-of-severe-acute-respiratory-infection-when-novel-coronavirus-\(ncov\)-infection-is-suspected](https://www.who.int/publications-detail/clinical-management-of-severe-acute-respiratory-infection-when-novel-coronavirus-(ncov)-infection-is-suspected) (accessed 09 May 2020).
3. Yang, J.; Zhang, Y.; Gou, X.; Pu, K.; Chen, Z.; Guo, Q.; Ji, R.; Wang, H.; Wang, Y.; Zhou, Y. Prevalence of comorbidities and its effects on patients infected with SARS-CoV-2: a systematic review and meta-analysis. *Int J Infect Dis* **2020**, *94*, 91-9; DOI:[10.1016/j.ijid.2020.03.017](https://doi.org/10.1016/j.ijid.2020.03.017)
4. Fang, L.; Karakiulakis, G.; Roth, M. Are patients with hypertension and diabetes mellitus at increased risk for COVID-19 infection? *Lancet Respir Med* **2020**, published online: [https://doi.org/10.1016/S2213-2600\(20\)30116-8](https://doi.org/10.1016/S2213-2600(20)30116-8)
5. Ingraham, N.E.; Lofti-Emran, S.; Thielen, B.; Techar, K.; Morris, R.S.; Holtan, S.G.; Dudley, R.A.; Tignanelli, C.J. Immunomodulation in Covid-19. *Lancet Respir Med* **2020**, published online: [https://doi.org/10.1016/S2213-2600\(20\)30226-5](https://doi.org/10.1016/S2213-2600(20)30226-5). (accessed 09 May 2020).
6. Royal College of General Practitioners. COVID-19 FAQs. Available online <https://www.rcgp.org.uk/covid-19/covid-19-faqs.aspx> (accessed 09 May 2020).
7. British Society of Rheumatologists. Covid-19 Guidance for Rheumatologists. May 2020. Available at <https://www.rheumatology.org.uk/News-Policy/Details/Covid19-Coronavirus-update-members> (accessed 09 May 2020).
8. McDermid, R.C.; Stelfox, H.T.; and Bagshaw, S.M. Frailty in the critically ill: A novel concept. *Crit Care* **2011**, *15*(1): 301; DOI: 10.1186/cc9297.
9. Clegg, A.; Young, J.; Iliffe, S.; Rikkert, M.O.; Rockwood, K. Frailty in elderly people. *Lancet* **2013**, *381*, (9868) 752-62; DOI: 10.1016/S0140-6736(12)62167-
10. Fried, L.P.; Tangen, C.; Walston, J.; Newman, A.B.; Hirsch, C.; Gottdiener, J.; Seeman, T.; Tracy, R.; Kop, W.J.; Burke, G.; McBurnie, M. Frailty in older adults: Evidence for a phenotype. *J Gerontol A Biol Sci Med Sci* **2001**, *56*, M146–M156; DOI:[10.1093/gerona/56.3.M146](https://doi.org/10.1093/gerona/56.3.M146)
11. Rockwood, K.; Song, X.; MacKnight, C.; Bergman, H.; Hogan, D.B.; McDowell, I.; Mitnitski, A. et al. A global clinical measure of fitness and frailty in elderly people. *CMAJ* **2005**, *173*, 489–495; DOI: 10.1503/cmaj.050051
12. Gilbert, T.; Neuburger, J.; Kraindler, J.; Keeble, E.; Smith, P.; Ariti, C.; Arora, S.; Street, A.; Parker, S.; Roberts, H.C.; Bardsley, M.; Conroy, S. Development and validation of a Hospital Frailty Risk Score focusing on older people in acute care settings using electronic hospital records: an observational study. *Lancet* **2018**, *391*,(10132) 1775-82; DOI: [10.1016/S0140-6736\(18\)30668-8](https://doi.org/10.1016/S0140-6736(18)30668-8)
13. Hewitt, J.; Moug, S.J.; Middleton, M.; Chakrabarti, M.; Stechman, M.J.; McCarthy, K. Prevalence of Frailty and its association with mortality in general surgery. *American Journal of Surgery* **2015**, *209*, 2, 254-259; DOI: 10.1016/j.amjsurg.2014.05.022

- 1  
2  
3  
4  
5  
6  
7  
8  
9  
10  
11  
12  
13  
14  
15  
16  
17  
18  
19  
20  
21  
22  
23  
24  
25  
26  
27  
28  
29  
30  
31  
32  
33  
34  
35  
36  
37  
38  
39  
40  
41  
42  
43  
44  
45  
46  
47  
48  
49  
50  
51  
52  
53  
54  
55  
56  
57  
58  
59  
60
14. Hewitt, J.; Carter, B.; McCarthy, K.; Pearce, L.; Law, J.; Wilson, F.V.; Tay, H.S.; McCormack, C.; Stechman, M.J.; Moug, S.J.; Phyo, K.M. Frailty predicts mortality in all emergency surgical admissions regardless of age. An observational study. *Age Ageing* **2019**, *48*, 3, 388-394; DOI: 10.1093/ageing/afy217
  15. Vilches-Moraga, A.; Rowley, M.; Fox, J.; Khan, H.; Paracha, A.; Price, A.; Pearce, L. Emergency Laparotomy in the older patient: factors predictive of 12-month mortality: Salford-POPS-GS. An observational study. *Aging Clin Exp Res*. Accepted April 2020
  16. Bebb, O.; Smith, F.G.; Clegg, A.; Hall, M.; Gale, C. Frailty and acute coronary syndrome: A structured literature review. *Eur Heart J Acute Cardiovasc Care* **2018**, *7*, 2,166-175; DOI: 10.1177/2048872617700873.
  17. Walker, D.M.; Gale, C.P.; Martin-Sanchez, F.J.; McIntyre, H.F.; Mueller, C.; Price, S.; Sanchis, J.; Vidan, M.T.; Wilkinson, C.; Zeymer, U.; Bueone, H. Frailty and the management of patients with acute cardiovascular disease: A position paper from the Acute Cardiovascular Care Association. *Eur Heart J Acute Cardiovasc Care* **2018**, *7*,2, 176-193; DOI: 10.1177/2048872618758931
  18. The High-Risk General Surgical Patient: Raising the Standard. Royal College of Surgeons of England. December **2018**. <https://www.surgeons.org/media/25768745/rcs-report-the-highrisk-general-surgical-patient-raising-thestandard-december-2018.pdf>] (accessed 10 May 2020).
  19. Cesari, M.; Costa, N.; Hoogendijk, E.O.; Vellas, B.; Canevelli, M.; Perez-Zepeda, M.U. How the Frailty Index May Support the Allocation of Health Care Resources: An Example From the INCUR Study. *J Am Med Dir Assoc* **2016**,*17*,5, 448-50; DOI: [10.1016/j.jamda.2016.02.007](https://doi.org/10.1016/j.jamda.2016.02.007)
  20. Muscedere, J.; Waters, B.; Varambally, A.; Bagshaw, S.M.; Boyd, J.G.; Maslove, D.; Sibley, S. The impact of frailty on intensive care unit outcomes: a systematic review and meta-analysis. *Intensive Care Med* **2017**, *43*, 8, 1105-22;
  21. COVID-19 rapid guideline: critical care in adults. NICE guideline. Published: 20 March 2020. [www.nice.org.uk/guidance/ng159](https://www.nice.org.uk/guidance/ng159) (accessed 10 May 2020).
  22. Guan, W.J.; Ni, Z.Y.; Hu, Y.; Liang, W.H.; Ou, C.Q.; He, J.X.; Liu, L.; Shan, H.; L, C.; Hui, D.; Du, B.; Li, L. et al. Clinical Characteristics of Coronavirus Disease 2019 in China. *N Engl J Med* **2020**, *382*, 1708-1720. DOI: 10.1056/NEJMoa2002032
  23. Richardson, S. Hirsch, J.S.; Narasimhan, M.; Crawford, J.M.; McGinn, T.; Davidson, K.W. Presenting Characteristics, Comorbidities, and Outcomes Among 5700 Patients Hospitalized With COVID-19 in the New York City Area. *JAMA* **2020**. Available online: <https://jamanetwork.com/journals/jama/fullarticle/2765184> doi:10.1001/jama.2020.6775
  24. Zhou, F.; Yu, T.; Du, R.; Fan, G.; Liu, Y.; Liu, Z.; Xiang, J.; Wang, Y.; Song, B.; Gu, X.; et al. Clinical course and risk factors for mortality of adult inpatients with COVID-19 in Wuhan, China: a retrospective cohort study. *Lancet* **2020**, *395*(10229),1054-62; DOI: [10.1016/S0140-6736\(20\)30566-3](https://doi.org/10.1016/S0140-6736(20)30566-3)
  25. ICNARC. The ICNARC report on covid-19 in critical care. April 2020. Available at <https://www.icnarc.org/Our-Audit/Audits/Cmp/Reports>
  26. Parmar, K.L.; Law, J.; Carter, B.; Hewitt, J.; Boyle, J.M.; Casey, P.; Maitra, I.; Farrell, I.S.; Pearce, L.; Moug, S.J. Frailty in Older Patients Undergoing Emergency Laparotomy, *Annals of Surgery*: 2019; DOI: 10.1097/SLA.0000000000003402

- 1  
2  
3  
4  
5  
6  
7  
8  
9  
10  
11  
12  
13  
14  
15  
16  
17  
18  
19  
20  
21  
22  
23  
24  
25  
26  
27  
28  
29  
30  
31  
32  
33  
34  
35  
36  
37  
38  
39  
40  
41  
42  
43  
44  
45  
46  
47  
48  
49  
50  
51  
52  
53  
54  
55  
56  
57  
58  
59  
60
27. Carter, B.; Law, J.; Hewitt, J.; Parmar, K.L.; Boyle, J.M.; Casey, P.; Maitra, I.; Pearce, L.; Moug, S.J. Association between preadmission frailty and care level at discharge in older adults undergoing emergency laparotomy. *Br J Surg* 2020 107, 3, 218-226 DOI: 10.1002/bjs.11392.Epub
28. Hewitt, J.; Owen, S.; Carter, B.R.; Stechman, M.J.; Tay, H.S.; Greig, M.; McCormack, C.; Pearce, L.; McCarthy, K.; Myint, P.K.; Moug, S.J. The Prevalence of Delirium in An Older Acute Surgical Population and Its Effect on Outcome. *Geriatrics*, 2019, 4, 57.
29. Myint, P.K.; Owen, S.; McCarthy, K.; Pearce, L.; Moug, S.J.; Stechman, M.J.; Carter, Ben. (2018). Is anaemia associated with cognitive impairment and delirium among older acute surgical patients? *Geriatrics & Gerontology International*. DOI; 10.1111/ggi.13293.
30. Dowswell, G.; Bartlett, D.C.; Futaba, K.; Whisker, L.; Pinkney, T. How to set up and manage a trainee-led research collaborative. *BMC Med Educ* 2014,14,94; DOI: 10.1186/1472-6920-14-94.
31. Jelley, B.; Long, S.; Butler, J.; Hewitt, J. Cohort profile: the Welsh Geriatric Registrar-Led Research Network (WeGeN): rationale, design and description. *BMJ Open* 2017;7:e013031; DOI: 10.1136/bmjopen-2016-013031.

**Author Contributions:**

All authors have read and agree to the finalised submitted version of the manuscript.

Conceptualization, JH and PKM

Methodology, JH, PKM, KMCC, BC;

Software, BC

Validation, BC, JH and PKM

Formal analysis, BC

Investigation, AP, FB-P, SD, AV-M, SM, TJQ, MJS, PB, EM, PKM, AV, JH, KMCC, LP

Resources, JH, PKM

Data curation, BC

Writing—original draft preparation, AP, FB-P, SD, AV-M, SM, BC, LP

Writing—review and editing, all authors

Visualization, all authors

Project administration, JH, PKM

**\*COPE Study Collaborators**

| Site                                             | Collaborators                                                                                                   |
|--------------------------------------------------|-----------------------------------------------------------------------------------------------------------------|
| Ysbyty Yystad Fawr, Caerphilly, Wales            | Charlotte Davey, Sheila Jones, Kiah Lunstone, Alice Cavenagh, Charlotte Silver, Thomas Telford, Rebecca Simmons |
| North Bristol Trust                              | Sandeep Singh, Dolcie Paxton; Francis Rickard, Mark Holloway, James Hesford, Tarik Jichi                        |
| Royal Alexandra Hospital, Paisley                | Norman Galbraith, Jenny Edwards, Emma Bhatti                                                                    |
| Inverclyde Royal Infirmary                       | Carly Bisset, Ross Alexander, Abigail Ingham                                                                    |
| Research Associate, Kings College London         | Roxanna Short                                                                                                   |
| Glasgow Royal Infirmary                          | Aine McGovern                                                                                                   |
| University Hospital of Wales, Cardiff            | Jemima Collins                                                                                                  |
| Aberdeen Royal Infirmary, NHS Grampian, Scotland | Eilidh Bruce, Alice Einarsson                                                                                   |
| Hospital Policlinico Modena                      | Enrico Clini, Professor Giovanni Guaraldi                                                                       |
| Salford Royal Hospital                           | Madeline Garcia, Shefali Sangani, Thomas Kneen, Thomas Lee                                                      |

**SHORT STUDY TITLE/ACRONYM:** COPE study.

**CONFLICT OF INTEREST:** The authors declare no conflict of interest

**FUNDING:** no funding was utilised for this work.

**DATA STATEMENT:** Data will be available by submitting a pre-planned hypothesis approved by the COPE Study investigators

**KEYWORDS:** observational study; protocol; older adults; COVID-19; frailty; immunosuppression; deprivation; ethnicity; nosocomial; ACE inhibitor

**WORD COUNT:** 3032

## Appendix A: Clinical Frailty Scale

| Clinical Frailty Scale                                                                                                                                                                                                                                                                                                                                                         |                                                                                                                                                                                                                                                                                                                                                                                                                                                                                                                                                                                         |
|--------------------------------------------------------------------------------------------------------------------------------------------------------------------------------------------------------------------------------------------------------------------------------------------------------------------------------------------------------------------------------|-----------------------------------------------------------------------------------------------------------------------------------------------------------------------------------------------------------------------------------------------------------------------------------------------------------------------------------------------------------------------------------------------------------------------------------------------------------------------------------------------------------------------------------------------------------------------------------------|
|  <p><b>1 Very Fit</b> – People who are robust, active, energetic and motivated. These people commonly exercise regularly. They are among the fittest for their age.</p>                                                                                                                       |  <p><b>7 Severely Frail</b> – Completely dependent for personal care, from whatever cause (physical or cognitive). Even so, they seem stable and not at high risk of dying (within ~ 6 months).</p>                                                                                                                                                                                                                                                                                                    |
|  <p><b>2 Well</b> – People who have no active disease symptoms but are less fit than category 1. Often, they exercise or are very active occasionally, e.g. seasonally.</p>                                                                                                                   |  <p><b>8 Very Severely Frail</b> – Completely dependent, approaching the end of life. Typically, they could not recover even from a minor illness.</p>                                                                                                                                                                                                                                                                                                                                                 |
|  <p><b>3 Managing Well</b> – People whose medical problems are well controlled, but are not regularly active beyond routine walking.</p>                                                                                                                                                      |  <p><b>9 Terminally Ill</b> – Approaching the end of life. This category applies to people with a life expectancy &lt;6 months, who are not otherwise evidently frail.</p>                                                                                                                                                                                                                                                                                                                             |
|  <p><b>4 Vulnerable</b> – While not dependent on others for daily help, often symptoms limit activities. A common complaint is being “slowed up”, and/or being tired during the day.</p>                                                                                                      | <p><b>Scoring frailty in people with dementia</b></p> <p>The degree of frailty corresponds to the degree of dementia. Common <b>symptoms in mild dementia</b> include forgetting the details of a recent event, though still remembering the event itself, repeating the same question/story and social withdrawal.</p> <p>In <b>moderate dementia</b>, recent memory is very impaired, even though they seemingly can remember their past life events well. They can do personal care with prompting.</p> <p>In <b>severe dementia</b>, they cannot do personal care without help.</p> |
|  <p><b>5 Mildly Frail</b> – These people often have more evident slowing, and need help in high order IADLs (finances, transportation, heavy housework, medications). Typically, mild frailty progressively impairs shopping and walking outside alone, meal preparation and housework.</p> |                                                                                                                                                                                                                                                                                                                                                                                                                                                                                                                                                                                         |
|  <p><b>6 Moderately Frail</b> – People need help with all outside activities and with keeping house. Inside, they often have problems with stairs and need help with bathing and might need minimal assistance (cuing, standby) with dressing.</p>                                          |                                                                                                                                                                                                                                                                                                                                                                                                                                                                                                                                                                                         |

Rockwood, K.; Song, X.; MacKnight, C.; Bergman, H.; Hogan, D.B.; McDowell, I. & Mitnitski, A. *CMAJ* 2005 173, 5, 489-495; DOI: <https://doi.org/10.1503/cmaj.050051>

# BMJ Open

## A study protocol for COPE study: COVID-19 in Older PEople – the influence of frailty and multimorbidity on survival. A multi-centre, European observational study

|                                 |                                                                                                                                                                                                                                                                                                                                                                                                                                                                                                                                                                                                                                                                                                                                                                                                                                                                                                                              |
|---------------------------------|------------------------------------------------------------------------------------------------------------------------------------------------------------------------------------------------------------------------------------------------------------------------------------------------------------------------------------------------------------------------------------------------------------------------------------------------------------------------------------------------------------------------------------------------------------------------------------------------------------------------------------------------------------------------------------------------------------------------------------------------------------------------------------------------------------------------------------------------------------------------------------------------------------------------------|
| Journal:                        | <i>BMJ Open</i>                                                                                                                                                                                                                                                                                                                                                                                                                                                                                                                                                                                                                                                                                                                                                                                                                                                                                                              |
| Manuscript ID                   | bmjopen-2020-040569.R1                                                                                                                                                                                                                                                                                                                                                                                                                                                                                                                                                                                                                                                                                                                                                                                                                                                                                                       |
| Article Type:                   | Protocol                                                                                                                                                                                                                                                                                                                                                                                                                                                                                                                                                                                                                                                                                                                                                                                                                                                                                                                     |
| Date Submitted by the Author:   | 28-Jul-2020                                                                                                                                                                                                                                                                                                                                                                                                                                                                                                                                                                                                                                                                                                                                                                                                                                                                                                                  |
| Complete List of Authors:       | Price, Angeline; Salford Royal NHS Trust, Ageing and Complex Medicine<br>Barlow-Pay, Fenella; Royal Alexandra Hospital<br>Duffy, Siobhan; Royal Alexandra Hospital<br>Pearce, Lyndsay; Salford Royal NHS Foundation Trust<br>Vilches-Moraga, Arturo; Salford Royal NHS Foundation Trust,<br>Moug, Susan; Royal Alexandra Hospital, General Surgery; University of<br>Glasgow<br>Quinn, Terry; University of Glasgow, Cardiovascular and Medical<br>Sciences<br>Stechman, Michael; University Hospital of Wales, General Surgery<br>Braude, Philip; North Bristol NHS Trust<br>Mitchell, Emma; North Bristol NHS Trust<br>Myint, Phyo; University of Aberdeen,<br>Verduri, Alessia; Hospital Policlinico Modena<br>McCarthy, Kathryn; North Bristol NHS Trust<br>Carter, Ben; King's College London, Biostatistics & Health Informatics;<br>King's College London<br>Hewitt, Jonathan; Cardiff University, Geriatric Medicine |
| <b>Primary Subject Heading</b>: | Global health                                                                                                                                                                                                                                                                                                                                                                                                                                                                                                                                                                                                                                                                                                                                                                                                                                                                                                                |
| Secondary Subject Heading:      | Geriatric medicine, Public health                                                                                                                                                                                                                                                                                                                                                                                                                                                                                                                                                                                                                                                                                                                                                                                                                                                                                            |
| Keywords:                       | GERIATRIC MEDICINE, Health policy < HEALTH SERVICES<br>ADMINISTRATION & MANAGEMENT, Public health < INFECTIOUS<br>DISEASES                                                                                                                                                                                                                                                                                                                                                                                                                                                                                                                                                                                                                                                                                                                                                                                                   |
|                                 |                                                                                                                                                                                                                                                                                                                                                                                                                                                                                                                                                                                                                                                                                                                                                                                                                                                                                                                              |

SCHOLARONE™  
Manuscripts





I, the Submitting Author has the right to grant and does grant on behalf of all authors of the Work (as defined in the below author licence), an exclusive licence and/or a non-exclusive licence for contributions from authors who are: i) UK Crown employees; ii) where BMJ has agreed a CC-BY licence shall apply, and/or iii) in accordance with the terms applicable for US Federal Government officers or employees acting as part of their official duties; on a worldwide, perpetual, irrevocable, royalty-free basis to BMJ Publishing Group Ltd ("BMJ") its licensees and where the relevant Journal is co-owned by BMJ to the co-owners of the Journal, to publish the Work in this journal and any other BMJ products and to exploit all rights, as set out in our [licence](#).

The Submitting Author accepts and understands that any supply made under these terms is made by BMJ to the Submitting Author unless you are acting as an employee on behalf of your employer or a postgraduate student of an affiliated institution which is paying any applicable article publishing charge ("APC") for Open Access articles. Where the Submitting Author wishes to make the Work available on an Open Access basis (and intends to pay the relevant APC), the terms of reuse of such Open Access shall be governed by a Creative Commons licence – details of these licences and which [Creative Commons](#) licence will apply to this Work are set out in our licence referred to above.

Other than as permitted in any relevant BMJ Author's Self Archiving Policies, I confirm this Work has not been accepted for publication elsewhere, is not being considered for publication elsewhere and does not duplicate material already published. I confirm all authors consent to publication of this Work and authorise the granting of this licence.

1  
2  
3  
4  
5  
6  
7  
8  
9  
10  
11  
12  
13  
14  
15  
16  
17  
18  
19  
20  
21  
22  
23  
24  
25  
26  
27  
28  
29  
30  
31  
32  
33  
34  
35  
36  
37  
38  
39  
40  
41  
42  
43  
44  
45  
46  
47  
48  
49  
50  
51  
52  
53  
54  
55  
56  
57  
58  
59  
60

For peer review only



**A study protocol for the COPE study: COVID-19 in Older PEople – the influence of frailty and multimorbidity on survival. A multi-centre, European observational study.**

**Price A<sup>1</sup>, Barlow-Pay F<sup>2</sup>, Duffy S<sup>3</sup>, Pearce L<sup>4</sup>, Vilches-Moraga A<sup>5</sup>, Moug SJ<sup>6</sup>, Quinn T<sup>7</sup>, Stechman M<sup>8</sup>, Braude P<sup>9</sup>, Mitchell E<sup>10</sup>, Myint PK<sup>11</sup>, Verduri A<sup>12</sup>, McCarthy K<sup>13</sup>, Carter B<sup>14</sup>, & Hewitt J<sup>15</sup>, on behalf of the COPE Study Collaborators\***

1. Miss Angeline Price (Corresponding Author), Advanced Clinical Practitioner, Department of Ageing and Complex Medicine, Salford Royal Hospital, Stott Lane, Salford M6 8HD  
[angeline.price@srft.nhs.uk](mailto:angeline.price@srft.nhs.uk)
2. Dr Fenella Barlow-Pay, Anaesthetic Trainee, Royal Alexandra Hospital, Corsebar Road, Paisley, Scotland, PA2 9PN
3. Dr Siobhan Duffy, Surgical Trainee, Royal Alexandra Hospital, Corsebar Road, Paisley, Scotland, PA2 9PN.
4. Miss Lyndsay Pearce, Consultant Surgeon, Salford Royal Hospital, Stott Lane, Salford M6 8HD
5. Dr Arturo Vilches- Moraga Consultant Geriatrician, Department of Ageing and Complex Medicine, Salford Royal Hospital, Stott Lane, Salford M6 8HD; [arturo.vilches-moraga@srft.nhs.uk](mailto:arturo.vilches-moraga@srft.nhs.uk)
6. Professor Susan Moug, Consultant Surgeon, Royal Alexandra Hospital, Corsebar Road, Paisley, Scotland, PA2 9PN and Honorary Professor, University of Glasgow, University Avenue, Glasgow, Scotland, G12 8QQ. [susanmoug@nhs.net](mailto:susanmoug@nhs.net)
7. Dr Terence J Quinn FRCP MD MBChB, Clinical Senior Lecturer, University of Glasgow and Honorary Consultant Physician, Glasgow Royal Infirmary email [terry.quinn@glasgow.ac.uk](mailto:terry.quinn@glasgow.ac.uk)
8. Mr Michael J Stechman, MBChB FRCS MD, Consultant Surgeon, University Hospital of Wales, Heath Park, Cardiff, CF14 4XW
9. Dr Philip Braude, Consultant Geriatrician, North Bristol NHS Trust
10. Dr Emma Mitchell BM MRCP, Specialist Registrar Geriatric Medicine, North Bristol NHS Trust
11. Professor Phyo Kyaw Myint, Professor of Medicine of Old Age, University of Aberdeen, Aberdeen, Scotland
12. Dr Alessia Verduri, Consultant Respiratory Physician, Respiratory Unit - University of Modena and Reggio Emilia - Hospital Policlinico Modena (Italy); [VerduriA@cardiff.ac.uk](mailto:VerduriA@cardiff.ac.uk)
13. Miss Kathryn McCarthy, Consultant Surgeon, North Bristol NHS Trust
14. Dr Ben Carter PhD, Senior trial statistician, King's College London

1  
2  
3 15. Dr Jonathan Hewitt, Clinical Senior Lecturer, Cardiff University and Honorary Consultant  
4 Physician, Aneurin Bevan University Health Board  
5  
6  
7  
8  
9  
10  
11  
12  
13  
14  
15  
16  
17  
18  
19  
20  
21  
22  
23  
24  
25  
26  
27  
28  
29  
30  
31  
32  
33  
34  
35  
36  
37  
38  
39  
40  
41  
42  
43  
44  
45  
46  
47  
48  
49  
50  
51  
52  
53  
54  
55  
56  
57  
58  
59  
60

For peer review only

## ABSTRACT

### Introduction

This protocol describes an observational study which set out to assess whether frailty and/or multi-morbidity correlates with short and medium term outcomes in patients diagnosed with COVID-19 in a European, multi-centre setting.

### Methods and analysis

Over a 3-month period we aim to recruit a minimum of 500 patients across ten hospital sites, collecting baseline data including: patient demographics; presence of co-morbidities; relevant blood tests on admission; prescription of angiotensin converting enzyme inhibitors (ACEi)/ angiotensin receptor blockers (ARBs)/ non-steroidal anti-inflammatory drugs (NSAIDs)/ immunosuppressants; smoking status; Clinical Frailty Score (CFS); length of hospital stay; mortality and readmission. All patients receiving inpatient hospital care > 18 years who receive a diagnosis of COVID-19 are eligible for inclusion. Long term follow up at 6 and 12 months is planned. This will assess frailty, quality of life and medical complications.

Our primary analysis will be short-term mortality and long-term mortality by CFS, adjusted for age (18-64, 65-80 and > 80) and gender. We will carry out a secondary analysis of the primary outcome by including additional clinical mediators which are determined statistically important using a likelihood ratio test. All analyses will be presented as crude and adjusted hazard ratio and odds ratio with associated 95% CIs and p values.

### Ethics and Dissemination

This study has been registered, reviewed and approved by the following; Health Research Authority (20/HRA1898), Ethics Committee of Hospital Policlinico Modena (369/2020/OSS/AOUMO) Italy, Health & Care Research Permissions Service, Wales, NHS Research Scotland Permissions Co-ordinating Centre, Scotland. All participating units obtained approval from their local Research & Development department consistent with the guidance from their relevant national organisation.

Data will be reported as a whole cohort. This project will be submitted for presentation at a national or international surgical and geriatric conference. Manuscript(s) will be prepared following the close of the project.

### Strengths and Limitations

- This is a large multi-centre study collecting data from throughout Europe
- Data is collected by a network of clinicians with an established track record of research in frailty
- Data collection is not entirely prospective. Some will be collected retrospectively.
- Targeted data collection was carried out

## 1. INTRODUCTION.

Severe acute respiratory syndrome coronavirus 2 (SARS-CoV-2 or COVID-19) was identified in 2019 as a novel strain of pneumonia inducing virus. Coronaviruses have been identified since the 1960s, with other strains including severe acute respiratory syndrome-related coronavirus (SARS) in 2003 and Middle East respiratory syndrome-related coronavirus (MERS) in 2012 causing significant human harm and global spread. COVID-19 has now been declared as a current worldwide pandemic [1] with predominant symptoms including: fever, cough and shortness of breath. The majority of people with COVID-19 have mild symptoms (81%), some develop severe illness requiring oxygen therapy (14%), with a smaller number requiring mechanical ventilation and/or intubation (5%) [2]. Early on in the pandemic, the most commonly reported presentation in severe COVID-19 was bilateral pneumonia [2]. Emerging literature has identified delirium, gastrointestinal disturbance and falls as predominant clinical signs in older, frail patients (3,4)

Certain risk factors have been identified as predisposing patients to poor outcomes such as hospital admission, need for ventilation and subsequent death. Individuals with risk factors including older age and comorbidities such as hypertension, cardiovascular disease and diabetes mellitus, have an increased risk of severe disease poor outcomes in both COVID-19 and non-COVID-19 populations [5, 6]. There has been speculation that drugs such as angiotensin converting enzyme inhibitors (ACEi) (eg ramipril, lisinopril, perindopril) and angiotensin receptor blockers (ARB) (losartan, candesartan), commonly taken by patients with hypertension, heart failure and diabetes mellitus, might increase susceptibility to coronavirus infection [7], as might other groups of drugs including non-steroidal anti-inflammatory drugs (NSAIDs) and immunosuppressants. These could be simple association rather than causation given the common use of pharmacotherapy such as ACEi and ARBs in multimorbid individuals. Chronic musculoskeletal and respiratory diseases are common in our ageing population and as a result there is a high usage of NSAIDs (either prescribed or over-the-counter) and long-term steroids. There is a theoretical possibility that immunosuppressants, such as steroids or other agents, used treat other conditions (e.g. renal disease, vasculitis, inflammatory bowel disease, transplant) confer benefit by modifying the host immune response to the virus resulting in less severe illness. [8].

Current professional guidelines recommend continuing these drugs [9,10]. This is based on a lack of available evidence that would clearly support withholding these medications during

1  
2  
3 the COVID-19 pandemic. By collecting data on these medications and their relationship to  
4 COVID-19 outcomes, we aim to improve on the current deficiency in evidence on whether it  
5 is safe to continue these medications, or whether they should be withdrawn.  
6  
7  
8

9  
10 Frailty is recognised as a potential contributing factor to poor outcomes in COVID-19. Frailty  
11 is characterised by reduced physiological reserve [11] and defined as 'a medical syndrome  
12 with multiple causes and contributors that is characterised by diminished strength,  
13 endurance and reduced physiological function that increases an individual's vulnerability for  
14 developing increased dependency or death' [12]. The frailty phenotype model categorises  
15 individuals into frail, pre-frail or not frail according to the presence of weight loss, self-  
16 reported exhaustion, low energy expenditure, slow gait speed and weak grip strength [13].  
17 The cumulative deficit model is validated to grade frailty in a person by identifying disability  
18 and comorbidity [14]. Frailty is associated with greater age, but not exclusively [15], and has  
19 been shown to correlate with adverse clinical outcomes including length of stay, mortality  
20 and institutionalisation. This association with frailty is present not only in geriatric medicine,  
21 but across a range of ages, specialties and interventions [16-19]. As a result, hospital teams  
22 are encouraged to routinely score frailty in adults [20, 21]. Frailty is more widely used than  
23 age alone as a trigger for specialist resource allocation, pathway decision aid and in shared  
24 decision making in older patients [22, 23]. Recent guidance from the National Institute for  
25 Clinical Excellence (NICE) recommended identification of frailty as part of a holistic  
26 assessment in facilitation of discussions with patients regarding critical care interventions in  
27 COVID-19 [24].  
28  
29  
30  
31  
32  
33

34 Despite this, and due to the novel nature of COVID-19, no information is available on how  
35 frailty affects overall outcomes. Whilst evidence relating to factors which pose an increased  
36 risk of poor outcomes for patients with COVID-19 has begun to emerge globally [25-27],  
37 there remains a paucity of evidence relating specifically to the United Kingdom (UK)  
38 population. This study aims to provide evidence regarding some of the patient characteristics  
39 which might indicate poor outcomes, as applies to the UK population and healthcare  
40 systems. It will provide valuable information about differences in care worldwide for the  
41 benefit of patients. Emerging narrative is demonstrating tentative links between both social  
42 deprivation and ethnicity on adverse outcomes in COVID-19 [28] therefore this information  
43 has been incorporated into baseline data collection in order to determine how outcomes  
44 across groups differed according to these characteristics.  
45  
46  
47  
48  
49  
50

51 Currently ten hospitals, including one site in Italy have joined the study. The study remains  
52 open to new recruiting sites. Following ethical approval, we will advertise recruitment through  
53 the established clinical research networks in Geriatric Medicine (GemRes, based in  
54 Birmingham and WeGen based in Wales) and via social media, notably Twitter, a platform  
55 upon which a high level of interest in COVID-19 related healthcare developments has been  
56 evidenced. Other sites will be eligible to recruit subject to local approval.  
57  
58  
59  
60

## Aims

To assess whether frailty and/or multimorbidity correlates with poor clinical outcomes in adult patients diagnosed with COVID-19 virus in a multi-centre setting.

The following research questions will be addressed:

1. What are the outcomes for frail and/ or multi-morbid adults diagnosed with COVID-19, including length of hospital stay and mortality?
2. What other factors influence outcomes in this setting, including medication, source of COVID-19 (community or nosocomial), socio-economic deprivation; ethnicity.

## 2. METHODS.

### 2.1 Study Summary

Table 1 provides the summary of the COPE study information.

**Table 1:** Study Summary

|                          |                                                                                                                                                                                                                                               |
|--------------------------|-----------------------------------------------------------------------------------------------------------------------------------------------------------------------------------------------------------------------------------------------|
| Study Title              | COVID-19 in Older PEople – the influence of frailty and multimorbidity on survival.                                                                                                                                                           |
| Short Title              | COPE study                                                                                                                                                                                                                                    |
| Study Design             | Observational                                                                                                                                                                                                                                 |
| Study Participants       | Adults aged 18 years and older, inpatients in an acute hospital setting with an illness relating to COVID -19                                                                                                                                 |
| Planned Size of Sample   | minimum 500                                                                                                                                                                                                                                   |
| No of study sites        | Minimum 10                                                                                                                                                                                                                                    |
| Start date               | 27 <sup>th</sup> February 2020.                                                                                                                                                                                                               |
| Planned Study Period     | 3 months                                                                                                                                                                                                                                      |
| Follow up duration       | 12 months                                                                                                                                                                                                                                     |
| Ethics/ registration No. | Health Research Authority (20/HRA1898)<br>Ethics Committee of Hospital Policlinico Modena (369/2020/OSS/AOUMO) Italy<br>Health & Care Research Permissions Service, Wales<br>NHS Research Scotland Permissions Co-ordinating Centre, Scotland |
| Research Question/Aim(s) | To assess frailty and multi-morbidity in older adults receiving acute inpatient care with a confirmed                                                                                                                                         |

|  |                                                                                                                                                                                                                                                                                                                                                                                                                                                                                                                                           |
|--|-------------------------------------------------------------------------------------------------------------------------------------------------------------------------------------------------------------------------------------------------------------------------------------------------------------------------------------------------------------------------------------------------------------------------------------------------------------------------------------------------------------------------------------------|
|  | <p>diagnosis of COVID -19. To correlate frailty with both short term and long-term outcomes.</p> <p>A secondary research question is the effect of ACEi, ARB, non-steroidal anti-inflammatory and immunosuppressive medications in COVID-19 patients.</p> <p>A further research question is how other factors including source of COVID-19 (community vs nosocomial), socio-economic deprivation; ethnicity and gender influence outcomes in this setting.</p> <p>Longer term mortality, quality of life and adverse medical outcomes</p> |
|--|-------------------------------------------------------------------------------------------------------------------------------------------------------------------------------------------------------------------------------------------------------------------------------------------------------------------------------------------------------------------------------------------------------------------------------------------------------------------------------------------------------------------------------------------|

## 2.2 Study design and setting.

Study setting: NHS hospitals in the UK and Worldwide partners (who will require separate local ethical compliance) that provide emergency care for patients diagnosed with COVID-19 have been invited to participate. Our team, the Older Persons Surgical Outcomes Collaborative (OPSOC) ([www.opsoc.eu](http://www.opsoc.eu)) have widely collected data on frailty previously using routinely collected service evaluation level data, predominantly but not exclusively focussing on surgery in the older person. OPSOC has a proven record of conducting high quality research and successfully publishing results relating to outcomes for older people [29-32]. OPSOC has an international reputation, related specifically to the care of the frail older person. Using well established research networks and experience in collaborative research and frailty, we wish to explore outcomes for older patients with COVID-19 infection.

Ten hospitals are already members of the OPSOC collaborative and are actively treating COVID-19 patients – Newport, Cardiff, Southmead Hospital Bristol, Bristol Royal Infirmary, Aberdeen Royal Infirmary, Royal Alexandra Hospital Paisley, Inverclyde Royal Infirmary, Salford Royal Hospital, Addenbrookes Hospital Cambridge, and Modena, Italy. The study will be open to other sites.

Research will be conducted using the established surgical and geriatric registrar-led research networks [33,34]. The methodology for these networks is well described but in brief the networks provide local Principal Investigators (PI's) that will co-ordinate local data collection and approvals in conjunction with Good Clinical Practice. These local leads act as a link between the local COPE team and the central Study Management Group (SMG). The Study Management Group will provide the ethical approvals, protocol and central organisation. Ultimately the SMG will analyse data and disseminate study findings, recognising all collaborators.

## 2.3 Study population.

**Inclusion criteria:** Any patient receiving inpatient hospital care with a clinical and/or laboratory confirmed diagnosis of COVID-19 aged 18 years and above



**Exclusion criteria:** Patients less than 18 years of age, and all patients aged 18 years and above without a clinically and/or laboratory confirmed diagnosis of COVID-19.

**Patient Screening:** Patients will be screened for inclusion criteria by the local team. This will be undertaken by a range of health care professionals involved in direct patient care at each site. Hospital or National Health Service (NHS) number will not be entered into this form but will be kept separately with a key sheet.

All transmission and storage of data will be encrypted and compliant with Health Insurance Portability and Accountability Act security guidelines. No patient identifiable information will be uploaded or stored on the secure database (password-protected login). Collaborators will anonymise patients by recording patient hospital numbers alongside database numbers in a separate secure spreadsheet to facilitate the collection of data locally. This database will be held within Cardiff University, Wales and stored for a minimum of 5 years.

## 2.4 Variables collected.

### Baseline data

- ▶ age, gender, deprivation score, ethnic origin
- ▶ co-morbidities: coronary artery disease, diabetes mellitus, hypertension, and the prescription of ACEi or ARB, NSAIDs and immunosuppressive agents
- ▶ smoking status (Never, Ex and Current)
- ▶ blood tests on admission or at time of symptom development: albumin, c-reactive protein (CRP), estimated glomerular filtration rate (eGFR)
- ▶ Clinical frailty score (CFS): 1-9 [supplementary Appendix A]

### Primary outcomes

- ▶ Short-term mortality (measured at Day-7<sup>&&</sup> and time-to- mortality) in frail vs non-frail patients with a COVID-19 diagnosis<sup>&&</sup>
- ▶ Long-term mortality (measured at 6 and 12 Months and time-to-mortality) in frail vs non-frail patients with a COVID-19 diagnosis<sup>&&</sup>

### Secondary outcomes

- ▶ Time to discharge (Length of hospital stay), measured in days from time of admission and/ or time of COVID-19 diagnosis to discharge;
- ▶ Effect of gender on outcomes in patients with COVID-19
- ▶ 30-day readmission to local hospital<sup>&</sup>
- ▶ Effect of certain drug classes on outcomes in patients with COVID-19<sup>&</sup>



- ▶ Effect of deprivation score and ethnicity on outcomes in patients with COVID-19<sup>&</sup>
- ▶ Adverse outcomes and quality of life at 6 and 12 months

*&Due to the nature and need for rapid reporting the following outcomes will be subject to later data collection and may be reported separately from the primary research findings.*

*&&Secondary Analysis studies will report the all-cause time-to-event as the primary outcome*

### **Frailty assessment**

We will use the Rockwood Clinical Frailty Score (supplementary Appendix A). This has been validated for use to assess frailty in older patients [14]. The score ranks from 1 to 9 with a score of  $\geq 5$  being classed as frail and 9 as terminally ill, and is based upon function 2 weeks prior to hospital admission. To ensure data quality each PI ensured adequate knowledge within the data collection team of frailty scoring using a short training video on how to complete the Clinical Frailty Scale 1-9.

### **Longer Term Follow Up**

Follow up is planned via telephone assessment at both 6 and 12 months. This will aim to reassess frailty using the Clinical Frailty Score, quality of life assessments; Trauma screening questionnaire TSQ, ICECAP-O, PHQ visits to GP, hospital readmissions, significant events involving major organ systems (thromboembolic; respiratory (including the Medical Research Council Respiratory questionnaire, use of long term oxygen) and renal sequelae).

## **2.5 Data management, Data protection and patient confidentiality**

All investigators and trial site staff will comply with the requirements of General Data Protection Regulation with regards to the collection, storage, processing and disclosure of personal information and will uphold the Data Protection Act's core principles.

Where personal information is collected, it will be kept secure, and maintained. This will involve:

- the creation of coded, depersonalised data where the participant's identifying information is replaced by an unrelated sequence of characters
- secure maintenance of the data and the linking code in separate locations using encrypted digital files within password protected folders and storage media
- limiting access to the minimum number of individuals necessary for quality control, audit, and analysis
- Confidentiality of data will be preserved when the data are transmitted to sponsors and co-investigators as patients will be assigned a study ID number.
- Data collected from sites will be via the electronic database.
- Data custodian is Dr Jonathan Hewitt.

- Only researchers who are directly involved in the data analysis will have full access to the study dataset (KM, BC, PB, SM, JH, PKM).

## 2.6 Statistical Analysis and Sample Size.

We will aim to recruit 500 patients; 50 patients across at least 10 sites. We estimated a minimum of 30% mortality in those that were frail, and 20% in those not frail (Hazard Ratio of 0.60). In order to detect this difference with 80% power and with a 5% significance at least 500 patients are needed to detect this difference. However, due to the emergent nature of this condition, it is envisaged that an interim analysis will be conducted as sample size increases.

Statistical support will be provided by OPSOC. Data will be analysed for correlation between frailty and outcomes, including Day 7 and Day 90 mortality.

Our primary analyses will measure mortality as the time-to-mortality using a mixed-effects Cox proportional hazards model, fitting site as a shared frailty (random intercept) to account for heterogeneity across different hospital sites.

Co-primary analyses will include: mortality at the short term (Day 7), analysed with a mixed effects logistic regression at Day 7 mortality.

The Secondary outcome: Time-to-discharge (herein described as length of stay), analyses as a time-to-event analysis consistent with the primary analysis.

Secondary analyses will be adjusted for age group and gender, and other clinically important covariates. Other clinically important covariates will be included after discussion with the COPE investigators, once more information is known about the link between baseline covariates and their association with COVID-19 (e.g. comorbidities). We will carry out a secondary analysis of the primary outcome by including additional clinical mediators which are determined clinically important and presented as a final multivariable model. All analyses will be presented as adjusted OR with associated 95% CIs and p values. All other outcomes will be analysed as per the above analysis, but will be deemed secondary outcomes.

Longer term time-points (e.g. Day 90) to be determined by the COPE investigators on receipt of further information from COVID-19 investigation.

The time to mortality (or discharge) will be recorded from the date of admission, to the date of outcome and will be considered community acquired. Where a patient has a positive COVID-19 diagnosis that is reported fifteen days after admission (or later), they will be recorded as the date from diagnosis to outcome and considered as nosocomial infection.

Missing data will be explored for symptomatic rationale and may be imputed after discussion with the COPE investigators. Subgroups for Age, sex, comorbidities may be explored to explain any mechanism of action found.

Anticipated recruitment data will be collected at participating sites for all patients meeting the inclusion criteria over a 3-month period. Validation will be performed by local teams on 25% of data fields for 10% of cases. The validated fields will include key demographic and outcome data.

## 2.7 Study Management Group (SMG).

This will be led by PKM (Aberdeen) and will involve reviewing safety data and, since the study collates observational data and there are minimal safety issues expected.

## 2.8 Patient and Public Involvement (PPI)

Due to the rapid onset of this pandemic and the urgency in analysis and dissemination of findings that will influence management of COVID-19 patients, it will not be possible to develop a PPI group of patients who have survived this illness. Many of them will remain clinically unwell, or in a period of self-isolation following COVID-19 infection. Towards the end of the study, if medically appropriate, the sponsor site will invite a group of patients back to the hospital to discuss their experiences. This will enable identification of key areas into which further investigation is required.

## 2.9 Role Of Study Sponsor And Funder.

Aneurin Bevan NHS Trust, as the honorary NHS employer of the Chief Investigator (CI), has a critical role as part of the governance board of this project. Cardiff University (the CI's substantive employer) is the Sponsor of the study. The sponsor is accountable for ensuring that the work is governed effectively and delivers the objectives that meet identified needs.

The sponsor will control the final decision regarding the study design, conduct, manuscript writing and dissemination of results.

The study at the time of writing has not received funding.

## 3.0 Quality assurance and Indemnity.

The quality of this study has been assessed by the following means:

- ▶ Establishment of the Study Management Group.
- ▶ Peer review by professionals with relevant expertise (Clinical trialists, nurses, frontline medical staff, statisticians, surgeons and geriatricians).
- ▶ Review by team at Cardiff University (Sponsor Institution).
- ▶ Safety reporting/adverse events will be reported by PIs. However, as this study involved routinely collected hospital data, we do not predict any.

This is an NHS-sponsored research stud, therefore indemnity cover via HSG (96) 48 applies.

## 3.1 Ethics and dissemination

Ethical approval for the study was sought via proportional ethical review. However, data collected are routinely recorded clinical data. Therefore, the study was deemed not to

1  
2  
3 require ethical approval and approval for the study was granted by the Health Research  
4 Authority (HRA) in the UK (<https://www.hra.nhs.uk/>) .  
5

6 Subsequently, this study has been registered, reviewed and approved by the following  
7 organisations:  
8

- 9 ▶ The HRA (Health Research Authority) for sites in England (20/HRA1898).
- 10
- 11 ▶ The NRSPCC (NHS Research Scotland Permissions Co-ordinating Centre) for sites in  
12 Scotland, with reciprocal approval was granted in Scotland by NRSPCC on 20th April 2020.  
13
- 14 ▶ The Health & Care Research Permissions Service for sites in Wales
- 15
- 16 ▶ Ethics Committee of Hospital Policlinico Modena (369/2020/OSS/AOUMO) Italy  
17

18 All participating units must obtain approval from their local Research & Development  
19 department consistent with the guidance from their relevant national organisation:  
20

21 The project will therefore be registered locally with the NHS Trust or Health Board or  
22 Institutional Research & Development department prior to commencing patient identification  
23 and data collection at each site. It is the responsibility of the local COPE Study team to  
24 ensure that local Research and Development approvals are in place prior to commencing  
25 data collection.  
26  
27  
28

29 All data will be reported as a whole cohort. Unit level data for comparison will be fed back to  
30 collaborators to support local service improvement. This project will be submitted for  
31 presentation at a national or international surgical and geriatric conference. Manuscript(s)  
32 will be prepared following the close of the project. Manuscripts will also be prepared  
33 following interim data analysis if numbers of patients recruited to the study at that time  
34 exceed the stated sample size.  
35  
36  
37  
38  
39  
40  
41  
42  
43  
44  
45  
46  
47  
48  
49  
50  
51  
52  
53  
54  
55  
56  
57  
58  
59  
60

## References

1. WHO Director-General's opening remarks at the media briefing on COVID-19. World Health Organization (WHO) (Press release). 11 March 2020. Available online: <https://www.who.int/dg/speeches/detail/who-director-general-s-opening-remarks-at-the-media-briefing-on-covid-19---11-march-2020> (accessed 09 May 2020).
2. World Health Organization. Clinical management of severe acute respiratory infection (SARI) when COVID-19 disease is suspected. Interim guidance. 13 March 2020. Available online: [https://www.who.int/publications-detail/clinical-management-of-severe-acute-respiratory-infection-when-novel-coronavirus-\(ncov\)-infection-is-suspected](https://www.who.int/publications-detail/clinical-management-of-severe-acute-respiratory-infection-when-novel-coronavirus-(ncov)-infection-is-suspected) (accessed 09 May 2020).
3. O'Hanlon, S. & Inouye, S. (2020) Delirium: a missing piece in the COVID-19 pandemic puzzle. *Age and Ageing*. 49 (4) 497-8 DOI: [10.1093/ageing/afaa094](https://doi.org/10.1093/ageing/afaa094)
4. Lithander, F., Neumann, S., Tenison, E., Lloyd, K., Welsh, T.... & Hendersen, E. (2020) COVID-19 in older people: a rapid clinical review. *Age and Ageing*. 49 (4) 501-15. DOI: [10.1093/ageing/afaa093](https://doi.org/10.1093/ageing/afaa093)
5. Yang, J.; Zhang, Y.; Gou, X.; Pu, K.; Chen, Z.; Guo, Q.; Ji, R.; Wang, H.; Wang, Y.; Zhou, Y. Prevalence of comorbidities and its effects on patients infected with SARS-CoV-2: a systematic review and meta-analysis. *Int J Infect Dis* **2020**, 94, 91-9; DOI:[10.1016/j.ijid.2020.03.017](https://doi.org/10.1016/j.ijid.2020.03.017)
6. Ticinesi, A., Nouvenne, A., Prati, B., Lauretani, F., Morelli, I., Tana, C., Fabi, M. & Meschi, T. (2019) Profiling the hospital dependent patient in a large academic hospital: Observational study. *European Journal of Internal Medicine*, 64, 41-47 DOI: [/10.1016/j.ejim.2019.02.013](https://doi.org/10.1016/j.ejim.2019.02.013)
7. Fang, L.; Karakiulakis, G.; Roth, M. Are patients with hypertension and diabetes mellitus at increased risk for COVID-19 infection? *Lancet Respir Med* **2020**, published online: [https://doi.org/10.1016/S2213-2600\(20\)30116-8](https://doi.org/10.1016/S2213-2600(20)30116-8)
8. Ingraham, N.E.; Lofti-Emran, S.; Thielen, B.; Techar, K.; Morris, R.S.; Holtan, S.G.; Dudley, R.A.; Tignanelli, C.J. Immunomodulation in Covid-19. *Lancet Respir Med* **2020**, published online: [https://doi.org/10.1016/S2213-2600\(20\)30226-5](https://doi.org/10.1016/S2213-2600(20)30226-5). (accessed 09 May 2020).
9. Royal College of General Practitioners. COVID-19 FAQs. Available online <https://www.rcgp.org.uk/covid-19/covid-19-faqs.aspx> (accessed 09 May 2020).
10. British Society of Rheumatologists. Covid-19 Guidance for Rheumatologists. May 2020. Available at <https://www.rheumatology.org.uk/News-Policy/Details/Covid19-Coronavirus-update-members> (accessed 09 May 2020).
11. McDermid, R.C.; Stelfox, H.T.; and Bagshaw, S.M. Frailty in the critically ill: A novel concept. *Crit Care* **2011**, 15(1): 301; DOI: [10.1186/cc9297](https://doi.org/10.1186/cc9297).
12. Clegg, A.; Young, J.; Iliffe, S.; Rikkert, M.O.; Rockwood, K. Frailty in elderly people. *Lancet* **2013**, 381, (9868) 752-62; DOI: [10.1016/S0140-6736\(12\)62167-](https://doi.org/10.1016/S0140-6736(12)62167-)
13. Fried, L.P.; Tangen, C.; Walston, J.; Newman, A.B.; Hirsch, C.; Gottdiener, J.; Seeman, T.; Tracy, R.; Kop, W.J.; Burke, G.; McBurnie, M. Frailty in older adults: Evidence for a phenotype. *J Gerontol A Biol Sci Med Sci* **2001**, 56, M146–M156; DOI:[10.1093/gerona/56.3.M146](https://doi.org/10.1093/gerona/56.3.M146)
14. Rockwood, K.; Song, X, MacKnight, C.; Bergman, H.; Hogan, D.B.; McDowell, I.; Mitnitski, A. et al. A global clinical measure of fitness and frailty in elderly people. *CMAJ* **2005**, 173, 489–495; DOI: [10.1503/cmaj.050051](https://doi.org/10.1503/cmaj.050051)
15. Gilbert, T.; Neuburger, J.; Kraindler, J.; Keeble, E.; Smith, P.; Ariti, C.; Arora, S.; Street, A.; Parker, S.; Roberts, H.C.; Bardsley, M.; Conroy, S. Development and validation of a Hospital

- Frailty Risk Score focusing on older people in acute care settings using electronic hospital records: an observational study. *Lancet* **2018**, 391,(10132) 1775-82; DOI: [10.1016/S0140-6736\(18\)30668-8](https://doi.org/10.1016/S0140-6736(18)30668-8)
16. Hewitt, J.; Moug, S.J.; Middleton, M.; Chakrabarti, M.; Stechman, M.J.; McCarthy, K. Prevalence of Frailty and its association with mortality in general surgery. *American Journal of Surgery* **2015**, 209, 2, 254-259; DOI: 10.1016/j.amjsurg.2014.05.022
  17. Hewitt, J.; Carter, B.; McCarthy, K.; Pearce, L.; Law, J.; Wilson, F.V.; Tay, H.S.; McCormack, C.; Stechman, M.J.; Moug, S.J.; Phyo, K.M. Frailty predicts mortality in all emergency surgical admissions regardless of age. An observational study. *Age Ageing* **2019**, 48, 3, 388-394; DOI: 10.1093/ageing/afy217
  18. Vilches-Moraga, A.; Rowley, M.; Fox, J.; Khan, H.; Paracha, A.; Price, A.; Pearce, L. Emergency Laparotomy in the older patient: factors predictive of 12-month mortality: Salford-POPS-GS. An observational study. *Aging Clin Exp Res*. Accepted April 2020
  19. Bebb, O.; Smith, F.G.; Clegg, A.; Hall, M.; Gale, C. Frailty and acute coronary syndrome: A structured literature review. *Eur Heart J Acute Cardiovasc Care* **2018**, 7, 2,166-175; DOI: 10.1177/2048872617700873.
  20. Walker, D.M.; Gale, C.P.; Martin-Sanchez, F.J.; McIntyre, H.F.; Mueller, C.; Price, S.; Sanchis, J.; Vidan, M.T.; Wilkinson, C.; Zeymer, U.; Bueone, H. Frailty and the management of patients with acute cardiovascular disease: A position paper from the Acute Cardiovascular Care Association. *Eur Heart J Acute Cardiovasc Care* **2018**, 7,2, 176-193; DOI: 10.1177/2048872618758931
  21. The High-Risk General Surgical Patient: Raising the Standard. Royal College of Surgeons of England. December **2018**. <https://www.surgeons.org/media/25768745/rcs-report-the-highrisk-general-surgical-patient-raising-thestandard-december-2018.pdf> [accessed 10 May 2020].
  22. Cesari, M.; Costa, N.; Hoogendijk, E.O.; Vellas, B.; Canevelli, M.; Perez-Zepeda, M.U. How the Frailty Index May Support the Allocation of Health Care Resources: An Example From the INCUR Study. *J Am Med Dir Assoc* **2016**,17,5, 448-50; DOI: [10.1016/j.jamda.2016.02.007](https://doi.org/10.1016/j.jamda.2016.02.007)
  23. Muscedere, J.; Waters, B.; Varambally, A.; Bagshaw, S.M.; Boyd, J.G.; Maslove, D.; Sibley, S. The impact of frailty on intensive care unit outcomes: a systematic review and meta-analysis. *Intensive Care Med* **2017**, 43, 8, 1105-22;
  24. COVID-19 rapid guideline: critical care in adults. NICE guideline. Published: 20 March 2020. [www.nice.org.uk/guidance/ng159](https://www.nice.org.uk/guidance/ng159) [accessed 10 May 2020].
  25. Guan, W.J.; Ni, Z.Y.; Hu, Y.; Liang, W.H.; Ou, C.Q.; He, J.X.; Liu, L.; Shan, H.; L, C.; Hui, D.; Du, B.; Li, L. et al. Clinical Characteristics of Coronavirus Disease 2019 in China. *N Engl J Med* **2020**, 382, 1708-1720. DOI: 10.1056/NEJMoa2002032
  26. Richardson, S. Hirsch, J.S.; Narasimhan, M.; Crawford, J.M.; McGinn, T.; Davidson, K.W. Presenting Characteristics, Comorbidities, and Outcomes Among 5700 Patients Hospitalized With COVID-19 in the New York City Area. *JAMA* **2020**. Available online: <https://jamanetwork.com/journals/jama/fullarticle/2765184> doi:10.1001/jama.2020.6775
  27. Zhou, F.; Yu, T.; Du, R.; Fan, G.; Liu, Y.; Liu, Z.; Xiang, J.; Wang, Y.; Song, B.; Gu, X.; et al. Clinical course and risk factors for mortality of adult inpatients with COVID-19 in Wuhan, China: a retrospective cohort study. *Lancet* **2020**, 395(10229),1054-62; DOI: [10.1016/S0140-6736\(20\)30566-3](https://doi.org/10.1016/S0140-6736(20)30566-3)



- 1  
2  
3 28. ICNARC. The ICNARC report on covid-19 in critical care. April 2020. Available at  
4 <https://www.icnarc.org/Our-Audit/Audits/Cmp/Reports>  
5  
6 29. Parmar, K.L.; Law, J.; Carter, B.; Hewitt, J.; Boyle, J.M.; Casey, P.; Maitra, I.; Farrell, I.S.;  
7 Pearce, L.; Moug, S.J. Frailty in Older Patients Undergoing Emergency Laparotomy, *Annals of*  
8 *Surgery*: 2019; DOI; 10.1097/SLA.0000000000003402  
9  
10 30. Carter, B.; Law, J.; Hewitt, J.; Parmar, K.L.; Boyle, J.M.; Casey, P.; Maitra, I.; Pearce, L.; Moug,  
11 S.J. Association between preadmission frailty and care level at discharge in older adults  
12 undergoing emergency laparotomy. *Br J Surg* 2020 107, 3, 218-226 DOI:  
13 10.1002/bjs.11392.Epub  
14  
15 31. Hewitt, J.; Owen, S.; Carter, B.R.; Stechman, M.J.; Tay, H.S.; Greig, M.; McCormack, C.;  
16 Pearce, L.; McCarthy, K.; Myint, P.K.; Moug, S.J. The Prevalence of Delirium in An Older Acute  
17 Surgical Population and Its Effect on Outcome. *Geriatrics*, 2019, 4, 57.  
18  
19 32. Myint, P.K.; Owen, S.; McCarthy, K.; Pearce, L.; Moug, S.J.; Stechman, M.J.; Carter, Ben.  
20 (2018). Is anaemia associated with cognitive impairment and delirium among older acute  
21 surgical patients? *Geriatrics & Gerontology International*. DOI; 10.1111/ggi.13293.  
22  
23 33. Dowswell, G.; Bartlett, D.C.; Futaba, K.; Whisker, L.; Pinkney, T. How to set up and manage a  
24 trainee-led research collaborative. *BMC Med Educ* 2014,14,94; DOI: 10.1186/1472-6920-14-  
25 94.  
26  
27 34. Jelley, B.; Long, S.; Butler, J.; Hewitt, J. Cohort profile: the Welsh Geriatric Registrar-Led  
28 Research Network (WeGeN): rationale, design and description. *BMJ Open* 2017;7:e013031;  
29 DOI: 10.1136/bmjopen-2016-013031.  
30  
31  
32  
33  
34  
35  
36  
37  
38  
39  
40  
41  
42  
43  
44  
45  
46  
47  
48  
49  
50  
51  
52  
53  
54  
55  
56  
57  
58  
59  
60

### Author Contributions:

All authors have read and agree to the finalised submitted version of the manuscript.

Conceptualization, JH and PKM

Methodology, JH, PKM, KMcC, BC;

Software, BC

Validation, BC, JH and PKM

Formal analysis, BC

Investigation, AP, FB-P, SD, AV-M, SM, TJQ, MJS, PB, EM, PKM, AV, JH, KMcC, LP

Resources, JH, PKM

Data curation, BC

Writing—original draft preparation, AP, FB-P, SD, AV-M, SM, BC, LP

Writing—review and editing, all authors

Visualization, all authors

Project administration, JH, PKM

### \*COPE Study Collaborators

| Site                                             | Collaborators                                                                                                   |
|--------------------------------------------------|-----------------------------------------------------------------------------------------------------------------|
| Ysbyty Yystad Fawr, Caerphilly, Wales            | Charlotte Davey, Sheila Jones, Kiah Lunstone, Alice Cavenagh, Charlotte Silver, Thomas Telford, Rebecca Simmons |
| North Bristol Trust                              | Sandeep Singh, Dolcie Paxton; Francis Rickard, Mark Holloway, James Hesford, Tarik Jichi                        |
| Royal Alexandra Hospital, Paisley                | Norman Galbraith, Jenny Edwards, Emma Bhatti                                                                    |
| Inverclyde Royal Infirmary                       | Carly Bisset, Ross Alexander, Abigail Ingham                                                                    |
| Research Associate, Kings College London         | Roxanna Short                                                                                                   |
| Glasgow Royal Infirmary                          | Aine McGovern                                                                                                   |
| University Hospital of Wales, Cardiff            | Jemima Collins                                                                                                  |
| Aberdeen Royal Infirmary, NHS Grampian, Scotland | Eilidh Bruce, Alice Einarsson                                                                                   |
| Hospital Policlinico Modena                      | Enrico Clini, Professor Giovanni Guaraldi                                                                       |
| Salford Royal Hospital                           | Madeline Garcia, Shefali Sangani, Thomas Kneen, Thomas Lee, George Kyriakopoulos, Michael Thomas, Denise Tan    |

**SHORT STUDY TITLE/ACRONYM:** COPE study.

**CONFLICT OF INTEREST:** The authors declare no conflict of interest



1  
2  
3 **FUNDING:** no funding was utilised for this work.  
4

5 **DATA STATEMENT:** Data will be available by submitting a pre-planned hypothesis  
6 approved by the COPE Study investigators  
7

8 **KEYWORDS:** observational study; protocol; older adults; COVID-19; frailty;  
9 immunosuppression; deprivation; ethnicity; nosocomial; ACE inhibitor  
10

11 **WORD COUNT:** 3542  
12  
13  
14  
15  
16  
17  
18  
19  
20  
21  
22  
23  
24  
25  
26  
27  
28  
29  
30  
31  
32  
33  
34  
35  
36  
37  
38  
39  
40  
41  
42  
43  
44  
45  
46  
47  
48  
49  
50  
51  
52  
53  
54  
55  
56  
57  
58  
59  
60

For peer review only

## Appendix A: Clinical Frailty Scale

| Clinical Frailty Scale                                                                                                                                                                                                                                                                                                                                                         |                                                                                                                                                                                                                                                                                                                                                                                                                                                                                                                                                                                         |
|--------------------------------------------------------------------------------------------------------------------------------------------------------------------------------------------------------------------------------------------------------------------------------------------------------------------------------------------------------------------------------|-----------------------------------------------------------------------------------------------------------------------------------------------------------------------------------------------------------------------------------------------------------------------------------------------------------------------------------------------------------------------------------------------------------------------------------------------------------------------------------------------------------------------------------------------------------------------------------------|
|  <p><b>1 Very Fit</b> – People who are robust, active, energetic and motivated. These people commonly exercise regularly. They are among the fittest for their age.</p>                                                                                                                       |  <p><b>7 Severely Frail</b> – Completely dependent for personal care, from whatever cause (physical or cognitive). Even so, they seem stable and not at high risk of dying (within ~ 6 months).</p>                                                                                                                                                                                                                                                                                                    |
|  <p><b>2 Well</b> – People who have no active disease symptoms but are less fit than category 1. Often, they exercise or are very active occasionally, e.g. seasonally.</p>                                                                                                                   |  <p><b>8 Very Severely Frail</b> – Completely dependent, approaching the end of life. Typically, they could not recover even from a minor illness.</p>                                                                                                                                                                                                                                                                                                                                                 |
|  <p><b>3 Managing Well</b> – People whose medical problems are well controlled, but are not regularly active beyond routine walking.</p>                                                                                                                                                      |  <p><b>9 Terminally Ill</b> – Approaching the end of life. This category applies to people with a life expectancy &lt;6 months, who are not otherwise evidently frail.</p>                                                                                                                                                                                                                                                                                                                             |
|  <p><b>4 Vulnerable</b> – While not dependent on others for daily help, often symptoms limit activities. A common complaint is being “slowed up”, and/or being tired during the day.</p>                                                                                                      | <p><b>Scoring frailty in people with dementia</b></p> <p>The degree of frailty corresponds to the degree of dementia. Common <b>symptoms in mild dementia</b> include forgetting the details of a recent event, though still remembering the event itself, repeating the same question/story and social withdrawal.</p> <p>In <b>moderate dementia</b>, recent memory is very impaired, even though they seemingly can remember their past life events well. They can do personal care with prompting.</p> <p>In <b>severe dementia</b>, they cannot do personal care without help.</p> |
|  <p><b>5 Mildly Frail</b> – These people often have more evident slowing, and need help in high order IADLs (finances, transportation, heavy housework, medications). Typically, mild frailty progressively impairs shopping and walking outside alone, meal preparation and housework.</p> |                                                                                                                                                                                                                                                                                                                                                                                                                                                                                                                                                                                         |
|  <p><b>6 Moderately Frail</b> – People need help with all outside activities and with keeping house. Inside, they often have problems with stairs and need help with bathing and might need minimal assistance (cuing, standby) with dressing.</p>                                          |                                                                                                                                                                                                                                                                                                                                                                                                                                                                                                                                                                                         |

Rockwood, K.; Song, X.; MacKnight, C.; Bergman, H.; Hogan, D.B.; McDowell, I. & Mitnitski, A. *CMAJ* 2005 173, 5, 489-495; DOI: <https://doi.org/10.1503/cmaj.050051>
